# Supplementary material
Source: publisher figshare collection journal article supplement (https://karger.figshare.com/ndownloader/files/23871881)
Supplement: Supplementary file 1 [file 23871881]

**Supplementary Table 1.** DBS settings for individual patients 12 months postoperatively.

| **Short PW**  **N** | **Active contacts, dx/sin** | **Amplitudes, dx/sin (V)** | **Pulse width (µs)** | **Frequency**  **(Hz)** |
| --- | --- | --- | --- | --- |
| 1 | 1-, 2-, 3+/1-, 2-, 3+ | 4.7/4.2 | 90 | 130 |
| 2 | 1-, 3-/0+, 1- | 2.8/3.0 | 90 | 130 |
| 3 | 0+, 1-, 2-/1+, 2-, 3- | 3.0/3.2 | 90 | 130 |
| 4 | 1-, 2-/1-, 2-, 3+ | 3.0/5.0 | 90 | 150 |
| 5 | 1-, 2-/1-, 2- | 3.0/1.3 | 90 | 150 |
| 6 | 0+, 1-, 2-/0+, 1-, 2- | 2.8/2.8 | 90 | 130 |
| 7 | 0+, 1-/1+, 2- | 3.5/3.5 | 90 | 160 |
| 8 | 0+, 1-, 2-/0+, 1-, 2- | 4.0/4.0 | 90 | 130 |
| 9 | 0+, 1-, 2-/0+, 1-, 2- | 3.5/3.5 | 90 | 130 |
| 10 | 0+, 1-, 2-/0+, 1-, 2- | 4.5/4.5 | 90 | 150 |
| 11 | 1-, 2-/1-, 2- | 3.5/3.5 | 90 | 150 |
| 12 | 0-/0-, 1- | 3.6/3.2 | 90 | 130 |
| 13 | 0+, 1-, 2-/0+, 1-, 2- | 3.0/3.5 | 90 | 130 |
| 14 | 0-, 1-/0-, 1- | 4.3/4.0 | 60 | 160 |
| 15 | 0+, 1-, 2-/0+, 1-, 2- | 3.4/3.4 | 90 | 130 |
| 16 | 0+, 1-, 2-/1+, 2- | 3.0/2.0 | 90 | 130 |
| 17 | 0+, 1-, 2-/0+, 1-, 2-, 3- | 3.5/3.9 | 90 | 130 |
| 18 | 1+, 2-/0+, 1-, 2- | 3.5/3.5 | 90 | 130 |
| **Long PW**  **N** | **Active contacts, dx/sin** | **Amplitudes, dx/sin (V)** | **Pulse width (µs)** | **Frequency**  **(Hz)** |
| 1 | 1-/1- | 2.0/2.0 | 450 | 130 |
| 2 | 1-/1- | 1.6/1.6 | 450 | 130 |
| 3 | 1-, 2-/1-, 2- | 2.0/2.0 | 450 | 130 |
| 4 | 1-/1- | 1.5/1.5 | 450 | 130 |
| 5 | 0-, 1- | 2.0/2.0 | 450 | 135 |
| 6 | 1-/1- | 1.8/1.8 | 450 | 130 |
| 7 | 1-/1- | 2.0/2.0 | 450 | 130 |
| 8 | 0-, 1-, 2-/0-, 1-, 2- | 2.0/2.0 | 450 | 130 |
| 9 | 1-/1- | 2.0/2.0 | 450 | 130 |
| 10 | 1-/1- | 1.5/1.5 | 450 | 130 |
| 11 | 1-/1- | 1.8/1.8 | 450 | 130 |
| 12 | 1-, 2-/1-, 2- | 2.1/2.1 | 450 | 130 |
| 13 | 1-, 2-/1-, 2- | 1.6/1.6 | 450 | 130 |
| 14 | 1-/1- | 1.95/1.95 | 450 | 130 |
| 15 | 1-, 2-/1-, 2- | 2.0/2.0 | 450 | 130 |
| 16 | 1-/1- | 1.8/1.8 | 450 | 130 |
| 17 | 1-, 2-, 3-/1-, 2-, 3- | 2.2/2.2 | 450 | 130 |
| 18 | 1-, 2-/1-, 2- | 1.5/1.5 | 450 | 130 |
| 19 | 1-/1- | 2.3/2.3 | 450 | 130 |
| 20 | 1-/1- | 1.7/1.7 | 450 | 130 |
| 21 | 1-/1- | 1.9/1.9 | 450 | 135 |
